# Supplementary material for: Integration of intestinal microbiota and metabonomics to elucidate different alleviation impacts of non-saponification and saponification astaxanthin pre-treatment on paracetamol-induced oxidative stress in rats
Source: Royal Society of Chemistry journal article supplement (doi:10.1039/d1fo02972j), 2022-01-01
Supplement: d1fo02972j1.pdf [file d1fo02972j1.pdf]

**Table 2S** Top 10 pathways involved in distinguishing nonsaponification Asta (N-Asta) and saponification Asta (S-Asta) pretreated groups

| Pathway                                             | Total | Hits | -LOG(p) | Impact  | compounds                      | pathway  | links                                                                                                                                         |
|-----------------------------------------------------|-------|------|---------|---------|--------------------------------|----------|-----------------------------------------------------------------------------------------------------------------------------------------------|
| D-Glutamine and D-glutamate metabolism              | 5     | 1    | 1.367   | 1       | C00025                         | rno00471 | <a href="http://www.kegg.jp/pathway/rno00471+C00025">http://www.kegg.jp/pathway/rno00471+C00025</a>                                           |
| alpha-Linolenic acid metabolism                     | 9     | 1    | 0.88771 | 1       | C06427                         | rno00592 | <a href="http://www.kegg.jp/pathway/rno00592+C06427">http://www.kegg.jp/pathway/rno00592+C06427</a>                                           |
| Synthesis and degradation of ketone bodies          | 5     | 2    | 3.5496  | 0.6     | C01089; C00164                 | rno00072 | <a href="http://www.kegg.jp/pathway/rno00072+C01089+C00164">http://www.kegg.jp/pathway/rno00072+C01089+C00164</a>                             |
| Phenylalanine, tyrosine and tryptophan biosynthesis | 4     | 1    | 1.5623  | 0.5     | C00082                         | rno00400 | <a href="http://www.kegg.jp/pathway/rno00400+C00082">http://www.kegg.jp/pathway/rno00400+C00082</a>                                           |
| Retinol metabolism                                  | 17    | 2    | 1.376   | 0.47938 | C00473; C00777                 | rno00830 | <a href="http://www.kegg.jp/pathway/rno00830+C00473+C00777">http://www.kegg.jp/pathway/rno00830+C00473+C00777</a>                             |
| beta-Alanine metabolism                             | 19    | 2    | 1.2172  | 0.44444 | C00099; C00106                 | rno00410 | <a href="http://www.kegg.jp/pathway/rno00410+C00099+C00106">http://www.kegg.jp/pathway/rno00410+C00099+C00106</a>                             |
| Glutathione metabolism                              | 26    | 4    | 2.8767  | 0.43034 | C00051; C00025; C01879; C00077 | rno00480 | <a href="http://www.kegg.jp/pathway/rno00480+C00051+C00025+C01879+C00077">http://www.kegg.jp/pathway/rno00480+C00051+C00025+C01879+C00077</a> |
| Taurine and hypotaurine metabolism                  | 8     | 2    | 2.6315  | 0.42857 | C00245; C05122                 | rno00430 | <a href="http://www.kegg.jp/pathway/rno00430+C00245+C05122">http://www.kegg.jp/pathway/rno00430+C00245+C05122</a>                             |
| Thiamine metabolism                                 | 7     | 1    | 1.0853  | 0.4     | C00378                         | rno00730 | <a href="http://www.kegg.jp/pathway/rno00730+C00378">http://www.kegg.jp/pathway/rno00730+C00378</a>                                           |
| Histidine metabolism                                | 15    | 3    | 3.0053  | 0.25269 | C00025; C03680; C00785         | rno00340 | <a href="http://www.kegg.jp/pathway/rno00340+C00025+C03680+C00785">http://www.kegg.jp/pathway/rno00340+C00025+C03680+C00785</a>               |
