# Supplementary material for: Integration of intestinal microbiota and metabonomics to elucidate different alleviation impacts of non-saponification and saponification astaxanthin pre-treatment on paracetamol-induced oxidative stress in rats
Source: Royal Society of Chemistry journal article supplement (doi:10.1039/d1fo02972j), 2022-01-01
Supplement: d1fo02972j2.pdf [file d1fo02972j2.pdf]

**Table 1S** Bacterial community comparisons at the genus level among the control (CK), paracetamol induction (Model), nonsaponification Asta pre-treated (N-Asta) and saponification Asta pre-treated (S-Asta) groups.

| <i>Taxon</i>                                 | <b>CK</b>                | <b>Model</b>            | <b>N-Asta</b>           | <b>S-Asta</b>           |
|----------------------------------------------|--------------------------|-------------------------|-------------------------|-------------------------|
| <i>Intestinibacter</i>                       | 13.79±7.30 <sup>a</sup>  | 33.08±5.59 <sup>b</sup> | 11.21±5.20 <sup>a</sup> | 11.25±5.31 <sup>a</sup> |
| <i>Allobaculum</i>                           | 12.89±11.11 <sup>b</sup> | 1.53±1.33 <sup>a</sup>  | 20.1±4.13 <sup>c</sup>  | 0.43±0.74 <sup>a</sup>  |
| <i>Lactobacillus</i>                         | 4.22±2.13 <sup>ab</sup>  | 15.39±3.30 <sup>c</sup> | 7.12±2.22 <sup>b</sup>  | 1.52±2.61 <sup>a</sup>  |
| <i>Bifidobacterium</i>                       | 10.16±1.14 <sup>d</sup>  | 8.54±1.29 <sup>c</sup>  | 5.66±1.79 <sup>b</sup>  | 1.91±0.92 <sup>a</sup>  |
| <i>Bacteroidales_S24-7_group_norank</i>      | 5.93±3.53 <sup>ab</sup>  | 1.72±0.77 <sup>a</sup>  | 3.65±2.36 <sup>a</sup>  | 12.8±7.49 <sup>c</sup>  |
| <i>Ruminococcaceae_UCG-014</i>               | 5.83±1.40 <sup>a</sup>   | 5.57±3.38 <sup>a</sup>  | 3.56±0.46 <sup>a</sup>  | 3.37±2.05 <sup>a</sup>  |
| <i>Akkermansia</i>                           | 3.61±3.56 <sup>b</sup>   | 2.15±0.79 <sup>b</sup>  | 0.31±0.15 <sup>a</sup>  | 12.16±1.64 <sup>c</sup> |
| <i>Lachnospiraceae_unclassified</i>          | 5.47±4.42 <sup>a</sup>   | 1.18±0.62 <sup>a</sup>  | 3.24±1.13 <sup>a</sup>  | 4.48±1.76 <sup>a</sup>  |
| <i>Ruminococcaceae_unclassified</i>          | 1.17±1.16 <sup>ab</sup>  | 0.49±0.30 <sup>a</sup>  | 3.17±1.78 <sup>b</sup>  | 7.01±2.63 <sup>c</sup>  |
| <i>Lachnospiraceae_NK4A136_group</i>         | 5.13±2.71 <sup>b</sup>   | 0.67±0.16 <sup>a</sup>  | 2.76±1.14 <sup>b</sup>  | 2.40±0.45 <sup>b</sup>  |
| <i>Enterorhabdus</i>                         | 2.36±1.15 <sup>a</sup>   | 5.15±1.74 <sup>b</sup>  | 1.41±0.22 <sup>a</sup>  | 1.27±0.88 <sup>a</sup>  |
| <i>Prevotellaceae_Ga6A1_group</i>            | 0.64±0.66 <sup>a</sup>   | 0.04±0.05 <sup>a</sup>  | 3.32±2.48 <sup>b</sup>  | 5.84±2.26 <sup>b</sup>  |
| <i>Erysipelotrichaceae_uncultured</i>        | 2.79±2.56 <sup>a</sup>   | 1.94±1.77 <sup>a</sup>  | 2.70±0.69 <sup>a</sup>  | 1.76±1.04 <sup>a</sup>  |
| <i>Coriobacteriaceae_UCG-002</i>             | 4.16±0.71 <sup>b</sup>   | 0.05±0.02 <sup>a</sup>  | 3.47±1.20 <sup>b</sup>  | 0.18±0.08 <sup>a</sup>  |
| <i>Romboutsia</i>                            | 1.99±1.19 <sup>a</sup>   | 2.02±1.19 <sup>a</sup>  | 1.62±0.68 <sup>a</sup>  | 1.80±0.84 <sup>a</sup>  |
| <i>[Eubacterium]_xylanophilum_group</i>      | 0.63±0.68 <sup>a</sup>   | 0.86±0.43 <sup>a</sup>  | 1.79±0.81 <sup>ab</sup> | 3.24±1.62 <sup>b</sup>  |
| <i>Faecalibaculum</i>                        | 2.00±2.12 <sup>b</sup>   | 0.95±0.66 <sup>a</sup>  | 2.82±2.30 <sup>b</sup>  | 0.50±0.55 <sup>a</sup>  |
| <i>Clostridium_sensu_stricto_1</i>           | 1.61±0.66 <sup>a</sup>   | 2.23±0.61 <sup>a</sup>  | 1.10±0.43 <sup>a</sup>  | 1.20±0.50 <sup>a</sup>  |
| <i>Ruminococcaceae_UCG-013</i>               | 1.00±0.20 <sup>a</sup>   | 4.06±2.93 <sup>b</sup>  | 0.35±0.09 <sup>a</sup>  | 0.58±0.32 <sup>a</sup>  |
| <i>Desulfovibrio</i>                         | 0.61±0.96 <sup>a</sup>   | 2.50±0.69 <sup>b</sup>  | 1.38±1.18 <sup>ab</sup> | 0.84±1.41 <sup>a</sup>  |
| <i>Ruminococcaceae_uncultured</i>            | 0.14±0.13 <sup>a</sup>   | 0.07±0.01 <sup>a</sup>  | 0.67±0.56 <sup>a</sup>  | 3.52±1.12 <sup>b</sup>  |
| <i>Lachnospiraceae_uncultured</i>            | 0.94±0.59 <sup>a</sup>   | 0.99±0.45 <sup>a</sup>  | 0.71±0.15 <sup>a</sup>  | 1.40±0.51 <sup>a</sup>  |
| <i>Adlercreutzia</i>                         | 1.90±1.33 <sup>a</sup>   | 0.33±0.11 <sup>a</sup>  | 0.56±0.10 <sup>a</sup>  | 0.67±0.58 <sup>a</sup>  |
| <i>Parasutterella</i>                        | 0.01±0.02 <sup>a</sup>   | 0.00±0.0 <sup>a</sup>   | 3.34±2.96 <sup>a</sup>  | 0.09±0.16 <sup>a</sup>  |
| <i>Lachnoclostridium</i>                     | 1.16±0.57 <sup>b</sup>   | 0.31±0.13 <sup>a</sup>  | 0.91±0.41 <sup>ab</sup> | 0.68±0.21 <sup>ab</sup> |
| <i>Ruminococcaceae_NK4A214_group</i>         | 0.59±0.51 <sup>ab</sup>  | 0.14±0.08 <sup>a</sup>  | 1.03±0.45 <sup>b</sup>  | 1.17±0.37 <sup>b</sup>  |
| <i>Intestinimonas</i>                        | 0.27±0.25 <sup>a</sup>   | 0.02±0.01 <sup>a</sup>  | 1.24±0.53 <sup>b</sup>  | 0.96±0.37 <sup>b</sup>  |
| <i>Roseburia</i>                             | 0.69±0.51 <sup>bc</sup>  | 0.07±0.02 <sup>a</sup>  | 0.38±0.07 <sup>ab</sup> | 1.31±0.40 <sup>c</sup>  |
| <i>Firmicutes_unclassified</i>               | 0.57±0.16 <sup>a</sup>   | 0.58±0.48 <sup>a</sup>  | 0.66±0.15 <sup>a</sup>  | 0.53±0.13 <sup>a</sup>  |
| <i>[Eubacterium]_coprostanoligenes_group</i> | 0.24±0.02 <sup>a</sup>   | 0.45±0.22 <sup>a</sup>  | 0.73±0.12 <sup>a</sup>  | 0.82±0.40 <sup>a</sup>  |
| <i>Candidatus_Saccharimonas</i>              | 0.85±0.28 <sup>a</sup>   | 0.70±0.09 <sup>a</sup>  | 0.15±0.08 <sup>a</sup>  | 0.27±0.14 <sup>a</sup>  |
| <i>Ruminiclostridium_9</i>                   | 0.09±0.07 <sup>a</sup>   | 0.06±0.01 <sup>a</sup>  | 0.40±0.36 <sup>b</sup>  | 1.33±0.55 <sup>c</sup>  |
| <i>Erysipelotrichaceae_unclassified</i>      | 0.84±0.58 <sup>b</sup>   | 0.02±0.01 <sup>a</sup>  | 0.97±0.05 <sup>b</sup>  | 0.05±0.07 <sup>a</sup>  |
| <i>Ruminococcus_1</i>                        | 0.18±0.08 <sup>a</sup>   | 0.10±0.04 <sup>a</sup>  | 0.26±0.09 <sup>a</sup>  | 1.17±0.37 <sup>b</sup>  |
| <i>Quinella</i>                              | 0.05±0.05 <sup>a</sup>   | 0.17±0.15 <sup>a</sup>  | 1.22±0.85 <sup>b</sup>  | 0.27±0.46 <sup>a</sup>  |
| <i>Streptococcus</i>                         | 0.17±0.30 <sup>a</sup>   | 1.22±0.66 <sup>b</sup>  | 0.08±0.08 <sup>a</sup>  | 0.10±0.10 <sup>a</sup>  |
| <i>Alloprevotella</i>                        | 0.12±0.16 <sup>a</sup>   | 0.00±0.00 <sup>a</sup>  | 0.09±0.10 <sup>a</sup>  | 0.88±1.51 <sup>a</sup>  |
| <i>Peptostreptococcaceae_unclassified</i>    | 0.41±0.52 <sup>a</sup>   | 0.02±0.02 <sup>a</sup>  | 0.18±0.09 <sup>a</sup>  | 0.16±0.08 <sup>a</sup>  |
| <i>Others</i>                                | 4.79±0.81 <sup>a</sup>   | 4.63±0.09 <sup>a</sup>  | 5.71±0.71 <sup>a</sup>  | 10.1±1.42 <sup>b</sup>  |

Note: Different letters of the same row in the four groups suggest  $p < 0.05$ .
