# Supplementary material for: Integration of intestinal microbiota and metabonomics to elucidate different alleviation impacts of non-saponification and saponification astaxanthin pre-treatment on paracetamol-induced oxidative stress in rats
Source: Royal Society of Chemistry journal article supplement (doi:10.1039/d1fo02972j), 2022-01-01
Supplement: d1fo02972j3.pdf [file d1fo02972j3.pdf]

**Table 3S** Composition of medium- and long-chain fatty acids in 15 d feces of nonsaponification Asta pre-treated (N-Asta) and saponification Asta pre-treated (S-Asta) groups.

| Content (µg/g)                  | N-Asta         | S-Asta                    | Content (µg/g)                    | N-Asta       | S-Asta                    |
|---------------------------------|----------------|---------------------------|-----------------------------------|--------------|---------------------------|
| C6:0 Caproate                   | 0.87 ± 0.01    | 1.03 ± 0.09               | C19:1N9T 10-Transnonadecenoate    | 6.25 ± 0.11  | 4.71 ± 0.77               |
| C8:0 Caprylate                  | ND             | ND                        | C18:2N6 Linoleate                 | 37.11 ± 0.86 | 17.61 ± 1.19**            |
| C10:0 Caprate                   | 0.21 ± 0.00    | 0.33 ± 0.07               | C20:0 Arachidate                  | 10.59 ± 1.13 | 10.50 ± 0.28              |
| C11:0 Unndecanoate              | ND             | ND                        | C18:3N6 GammaLinolenate           | 0.85 ± 0.10  | 0.98 ± 0.22               |
| C12:0 Laurate                   | 0.96 ± 0.16    | 1.75 ± 0.26               | C20:1T Trans11-Eicosenoate        | 4.72 ± 0.18  | 7.53 ± 0.96               |
| C13:0 Tridecanoate              | 1.64 ± 0.13    | 2.32 ± 0.59               | C20:1 11-Eicosenoate              | 3.39 ± 0.10  | 3.83 ± 0.39               |
| C14:0 Myristate                 | 9.16 ± 0.71    | 13.88 ± 1.43              | C18:3N3 AlphaLinolenate           | 1.27 ± 0.09  | 1.38 ± 0.03               |
| C14:1 T Myristelaidate          | 8.93 ± 0.07    | 12.33 ± 2.01              | C21:0 Heneicosanoate              | 0.50 ± 0.03  | 0.54 ± 0.03               |
| C14:1 Myristoleate              | 8.04 ± 0.06    | 10.54 ± 1.49              | C20:2 11-14 Eicosadienoate        | 3.09 ± 0.04  | 2.53 ± 0.19               |
| C15:0 Pentadecanoate            | 7.49 ± 1.01    | 17.50 ± 2.92 <sup>#</sup> | C22:0 Behenate                    | 6.38 ± 0.90  | 5.30 ± 0.03               |
| C15:1 T 10-Transpentadecenoate  | 1.91 ± 0.18    | 2.55 ± 0.59               | C20:3N6 HOMO Homogamma Linolenate | 3.74 ± 0.04  | 2.19 ± 0.22**             |
| C15:1 10-Pentadecenoate         | 2.78 ± 0.01    | 3.40 ± 0.41               | C22:1N9T Brassidate               | 3.86 ± 0.33  | 4.54 ± 0.38               |
| C16:0 Palmitate                 | 884.38 ± 81.74 | 977.31 ± 89.54            | C22:1N9 Erucate                   | 14.39 ± 0.40 | 7.23 ± 0.71**             |
| C16:1T Palmitelaidate           | 17.85 ± 4.93   | 21.98 ± 0.10              | C20:3N3 11-14-17 Eicosatrienoate  | 0.72 ± 0.15  | 0.78 ± 0.00               |
| C16:1 Palmitoleate              | 5.16 ± 0.13    | 6.39 ± 0.77               | C20:4N6 Arachidonate              | 35.92 ± 2.70 | 9.66 ± 0.71**             |
| C17:0 Heptadecanoate            | 5.62 ± 0.52    | 6.41 ± 0.43               | C23:0 Tricosanoate                | 3.11 ± 0.25  | 2.81 ± 0.45               |
| C17:1 T 10-Transsheptadecenoate | 4.02 ± 0.06    | 5.07 ± 0.59               | C22:2 Docosadienoate              | 1.45 ± 0.04  | 1.94 ± 0.01 <sup>##</sup> |
| C17:1 10-Heptadecenoate         | 3.42 ± 0.14    | 6.17 ± 1.33               | C20:5N3EPAEicosapentaenoate       | 1.28 ± 0.13  | 1.31 ± 0.39               |
| C18:0 Stearate                  | 515.08 ± 6.36  | 609.56 ± 40.24            | C24:0 Lignocerate                 | 12.65 ± 2.32 | 11.40 ± 0.75              |
| C18:1 N12T Petroselaidate       | 2.34 ± 0.06    | 2.81 ± 0.37               | C24:1 Nervonoate                  | 7.37 ± 0.08  | 7.92 ± 0.89               |
| C18:1N9T Elaidate               | 3.14 ± 0.42    | 4.08 ± 0.76               | C22:4 Docosatetraenoate           | 4.80 ± 0.35  | 2.35 ± 0.50*              |
| C18:1N7T Transvaccenate         | 42.46 ± 5.64   | 54.46 ± 5.65              | C22:5N6 DPA Docosapentaenoate     | 1.68 ± 0.18  | 1.55 ± 0.68               |
| C18:1N12 Petroselinate          | 28.83 ± 4.31   | 32.34 ± 3.26              | C22:5N3 DPA Docosapentaenoate     | 2.14 ± 0.35  | 1.34 ± 0.83               |

|                                |              |              |                               |                  |                  |
|--------------------------------|--------------|--------------|-------------------------------|------------------|------------------|
| C18:1N9C Oleate                | 68.59 ± 6.87 | 68.46 ± 3.69 | C22:6N3 DHA Docosahexaenoate  | 5.86 ± 0.20      | 2.82 ± 0.10**    |
| C18:1N7 Vaccenate              | 10.18 ± 0.19 | 12.27 ± 1.73 | Total fatty acids             | 1814.35 ± 114.63 | 1996.01 ± 165.17 |
| C18:2N6T Linoelaidate          | 1.39 ± 0.00  | 1.65 ± 0.19  | Total saturated fatty acids   | 1462.00 ± 95.07  | 1664.48 ± 135.06 |
| C19:1N12T 7-Transnonadecenoate | 6.79 ± 0.11  | 8.65 ± 1.05  | Total unsaturated fatty acids | 352.34 ± 19.56   | 331.53 ± 30.12   |

Note: ND represents no detection. “\*” and “\*\*” indicate significant decreases  $p < 0.05$ , and  $p < 0.01$ , respectively. “#” and “##” indicate significant increases  $p < 0.05$ , and  $p < 0.01$ , respectively in same fatty acid.
